# Supplementary material for: High-resolution forest carbon flux mapping and monitoring in the Pacific Northwest with time since disturbance and disturbance legacies inferred from remote sensing and inventory data
Source: Copernicus journal article supplement (doi:10.5194/bg-2016-163), 2016-05-17

## Supplementary Figures

**Fig. S1** Characteristic NEP trajectories following a stand-replacing disturbance in the PNW region. Solid lines are plotted for high site productivity, and dashed lines for low productivity.

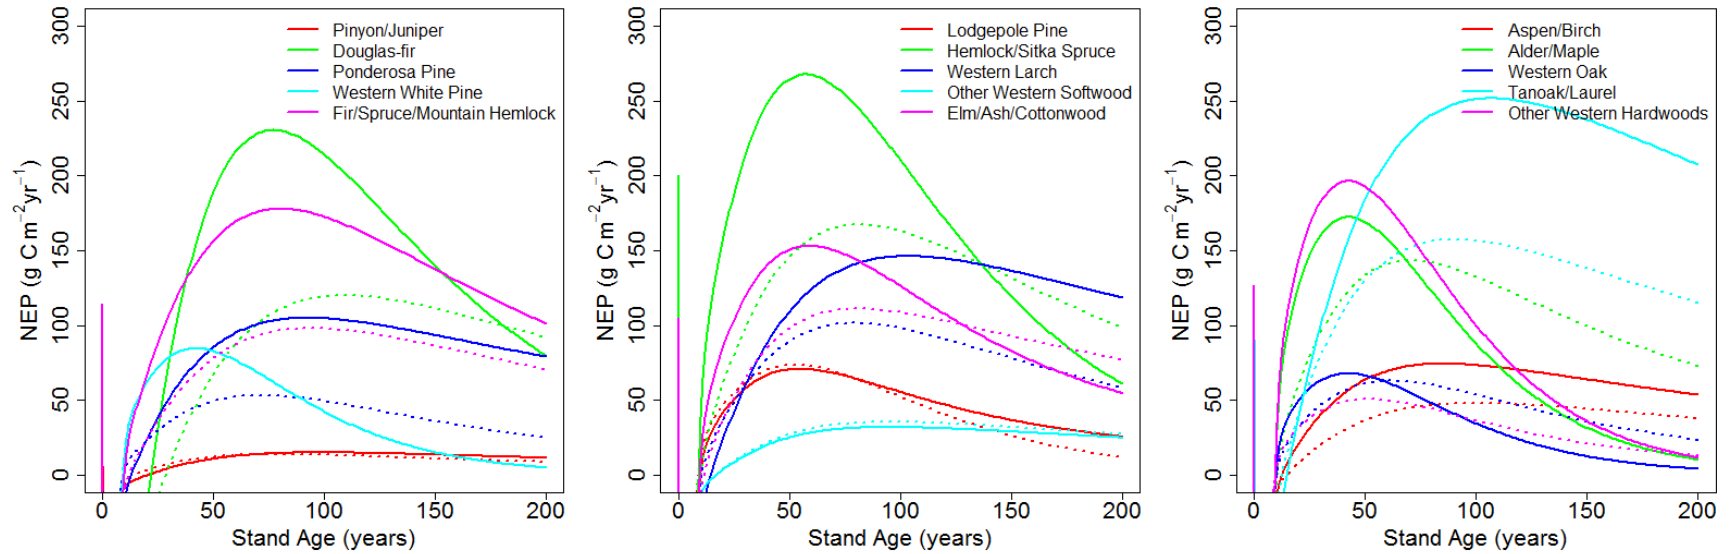

**Fig. S2** Post-fire characteristic trajectories of NEP in the PNW region. Solid lines are plotted for high site productivity, and dashed lines for low productivity. Figures in the first row are plotted for low severity fire, second row for medium severity fire, and the third row for high severity fire.

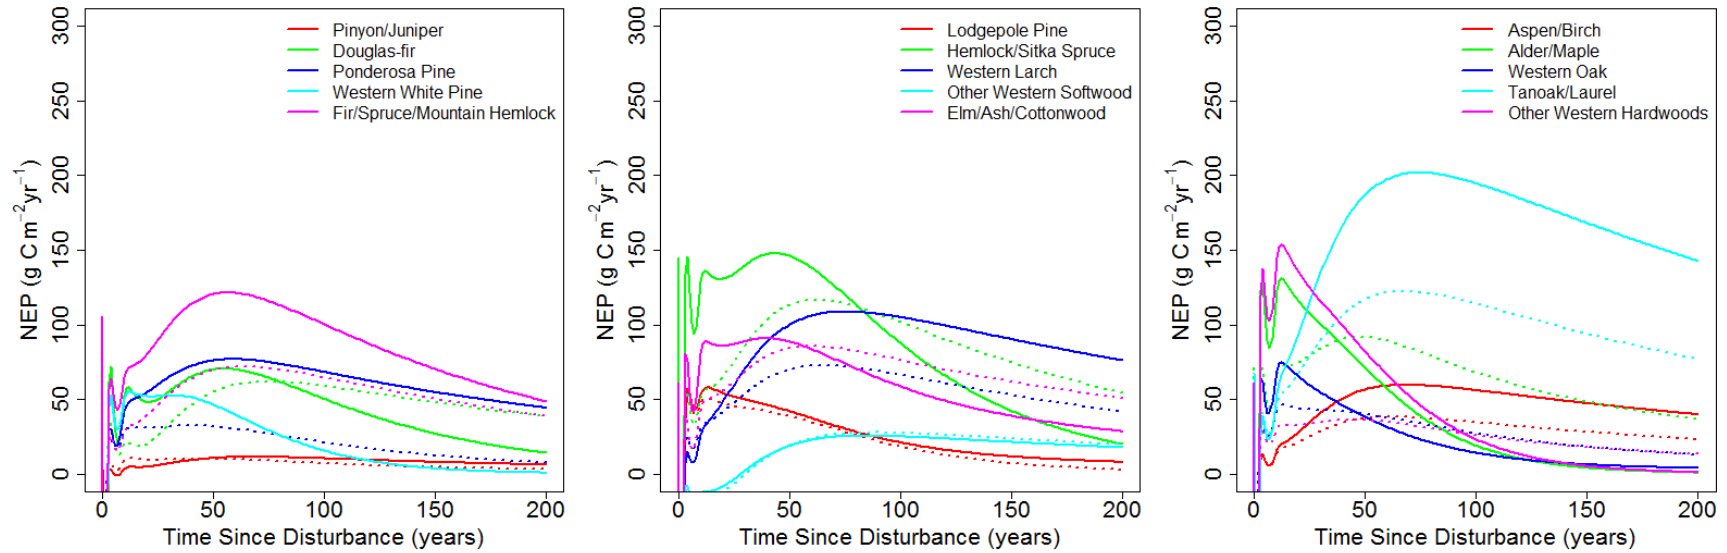

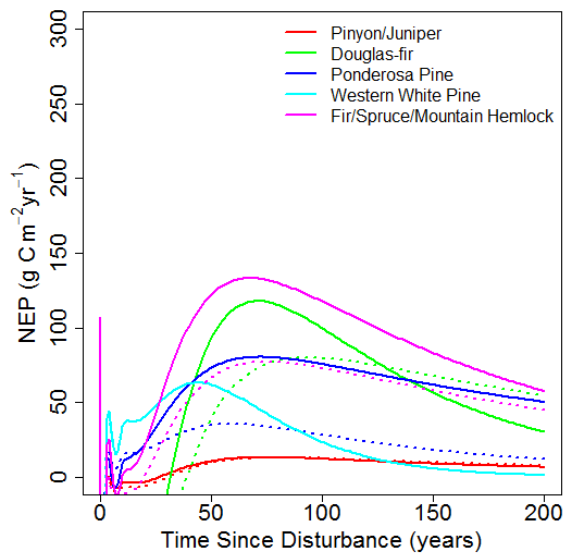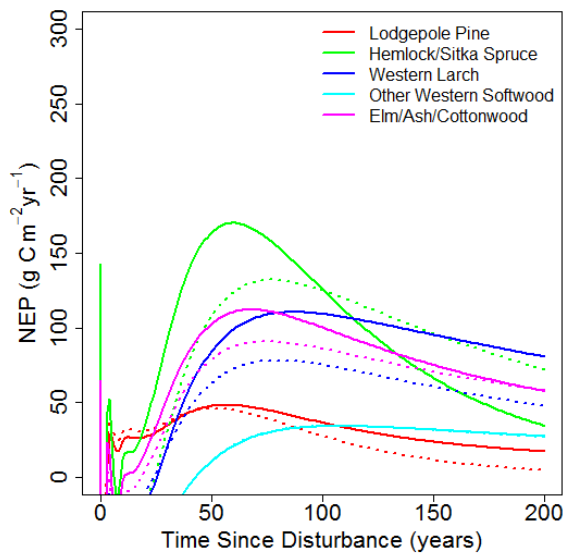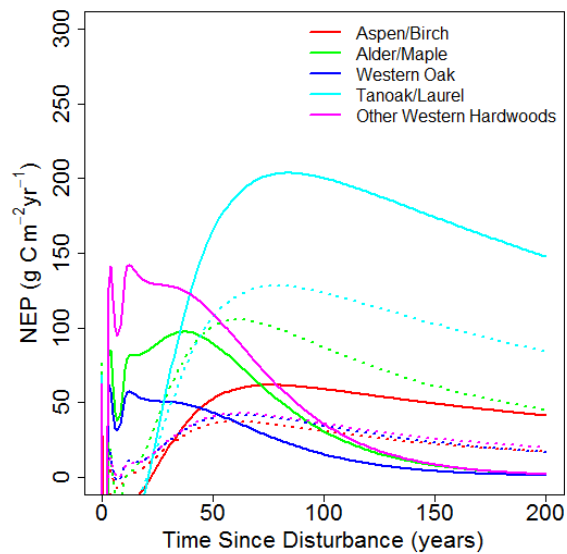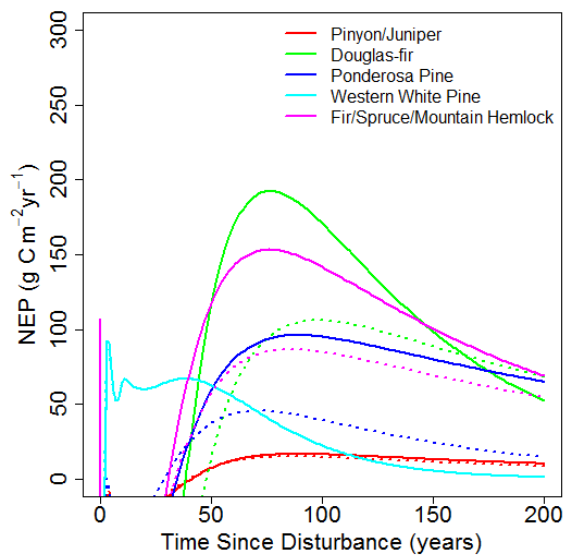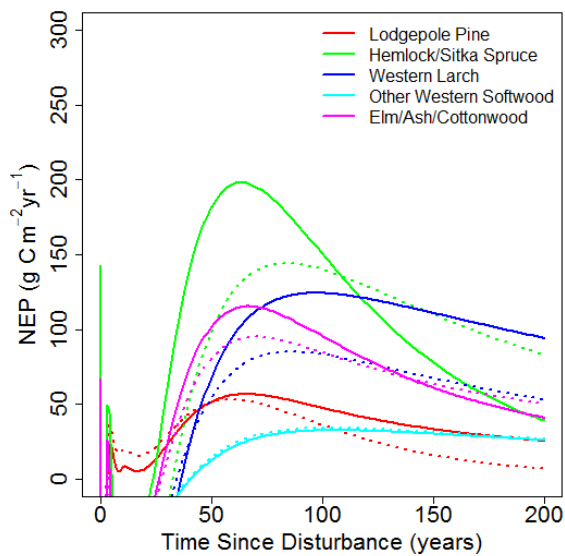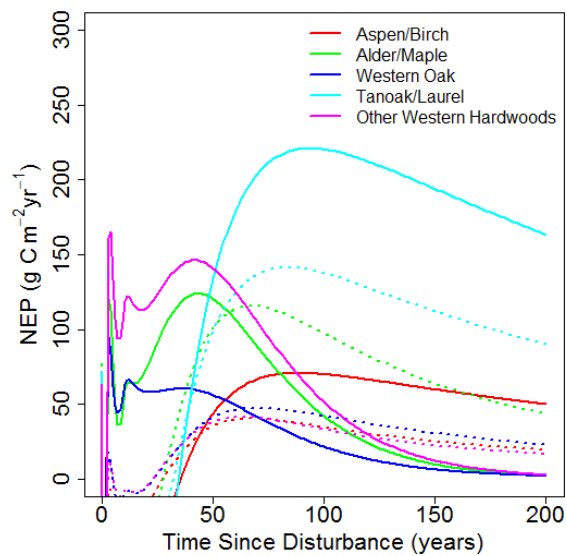

Supplement: Supplementary file 1 [file bg-2016-163-supplement.pdf]
